# Supplementary material
Source: publisher figshare collection journal article supplement (https://geolsoc.figshare.com/ndownloader/files/5421266)
Supplement: Supplementary file 1 [file 5421266]

analyses	rock type	texture	SiO2	TiO2	Al2O3	FeO	MnO	MgO	CaO	Na2O	Cr2O3	Total	Si	Ti	Al	Fe3+	Fe2+	Mn	Mg	Ca	Na	Cr	Total	Si+Al	AlIV	AlVI	Altotal	Wo	En	Fs	Total	Mg#	Cr#
TM 22 5-33	harz	granoblastic	53.53	0.06	2.53	2.43	0.08	17.13	22.71	0.88	0.78	100.14	1.93	0.00	0.11	0.07	0.01	0.00	0.92	0.88	0.06	0.02	4.00	2.04	0.07	0.04	0.11	46.8	49.1	4.0	100.00	0.926	0.17
Tm 22 5-34	harz	granoblastic	53.91	0.01	2.38	2.70	0.00	17.33	22.65	0.73	0.84	100.55	1.94	0.00	0.10	0.05	0.03	0.00	0.93	0.87	0.05	0.02	4.00	2.04	0.06	0.04	0.10	46.4	49.3	4.3	100.00	0.920	0.19
TM 22 25 A-64	lherz	granoblastic	53.50	0.09	2.83	2.37	0.04	16.81	22.55	0.60	0.84	99.63	1.95	0.00	0.12	0.00	0.07	0.00	0.91	0.88	0.04	0.02	4.00	2.07	0.05	0.07	0.12	47.2	48.9	3.9	100.00	0.927	0.17
TM 22 25 A-66	lherz	granoblastic	53.35	0.03	2.93	2.25	0.02	16.95	22.48	0.70	0.78	99.48	1.94	0.00	0.13	0.02	0.05	0.00	0.92	0.88	0.05	0.02	4.00	2.06	0.06	0.06	0.13	47.0	49.3	3.7	100.00	0.931	0.15
TM 22 25 A-67	lherz	granoblastic	52.96	0.07	2.55	2.66	0.03	17.04	22.92	0.61	0.61	99.45	1.93	0.00	0.11	0.06	0.02	0.00	0.92	0.89	0.04	0.02	4.00	2.04	0.07	0.04	0.11	47.0	48.7	4.3	100.00	0.919	0.14
TM 22 25 A-69	lherz	granoblastic	53.12	0.08	2.92	2.54	0.10	17.04	22.61	0.60	0.83	99.84	1.93	0.00	0.12	0.04	0.04	0.00	0.92	0.88	0.04	0.02	4.00	2.05	0.07	0.05	0.12	46.7	49.0	4.3	100.00	0.923	0.16
TM 22 25 A-70	lherz	granoblastic	53.70	0.03	3.00	2.37	0.08	16.86	22.97	0.67	0.72	100.40	1.94	0.00	0.13	0.02	0.05	0.00	0.91	0.89	0.05	0.02	4.00	2.06	0.06	0.06	0.13	47.5	48.5	3.9	100.00	0.927	0.14
TM 22 25 A-72	lherz	granoblastic	53.60	0.05	2.48	2.43	0.10	17.46	22.81	0.62	0.51	100.06	1.94	0.00	0.11	0.05	0.02	0.00	0.94	0.88	0.04	0.01	4.00	2.04	0.06	0.04	0.11	46.5	49.5	4.0	100.00	0.927	0.12
TM 22 6-133	lherz	mylonitic	53.41	0.05	2.09	1.80	0.16	17.12	25.36	0.15	0.48	100.63	1.93	0.00	0.09	0.05	0.00	0.00	0.92	0.98	0.01	0.01	4.00	2.01	0.07	0.01	0.09	50.0	47.0	3.0	100.00	0.944	0.13
TM 22 6-134	lherz	mylonitic	53.94	0.00	1.33	1.86	0.00	17.88	24.90	0.11	0.32	100.35	1.95	0.00	0.06	0.05	0.01	0.00	0.96	0.96	0.01	0.01	4.00	2.00	0.05	0.00	0.06	48.6	48.6	2.8	100.00	0.945	0.14
TM 22 9-100	lherz	mylonitic	54.14	0.11	1.63	1.59	0.09	17.37	25.09	0.12	0.49	100.63	1.95	0.00	0.07	0.02	0.03	0.00	0.93	0.97	0.01	0.01	4.00	2.02	0.05	0.02	0.07	49.6	47.8	2.6	100.00	0.951	0.17
TM 22 9-104	lherz	mylonitic	53.99	0.07	1.91	1.70	0.14	17.20	25.20	0.15	0.48	100.84	1.94	0.00	0.08	0.03	0.03	0.00	0.92	0.97	0.01	0.01	4.00	2.02	0.06	0.02	0.08	49.8	47.3	2.9	100.00	0.947	0.14
TM 22 9-106	lherz	mylonitic	54.41	0.00	1.14	2.12	0.15	18.70	23.66	0.11	0.26	100.55	1.96	0.00	0.05	0.04	0.02	0.00	1.00	0.91	0.01	0.01	4.00	2.00	0.04	0.00	0.05	46.0	50.6	3.4	100.00	0.940	0.13
TM 22 9-113	lherz	mylonitic	53.52	0.27	2.70	1.69	0.14	17.00	23.60	0.75	0.93	100.58	1.92	0.01	0.11	0.05	0.00	0.00	0.91	0.91	0.05	0.03	4.00	2.04	0.08	0.04	0.11	48.5	48.6	2.9	100.00	0.947	0.19
TM 22 9-114	lherz	mylonitic	53.04	0.21	3.22	1.50	0.03	16.23	23.51	0.80	1.48	100.02	1.92	0.01	0.14	0.02	0.02	0.00	0.88	0.91	0.06	0.04	4.00	2.06	0.08	0.06	0.14	49.7	47.8	2.5	100.00	0.951	0.24
TM 22 7-80	pyroxenite	adcumulate	49.57	1.27	7.06	6.76	0.08	13.26	20.38	1.30	0.37	100.05	1.82	0.03	0.31	0.07	0.14	0.00	0.73	0.80	0.09	0.01	4.00	2.12	0.18	0.12	0.31	46.1	41.8	12.1	100.00	0.778	0.03
TM 22 7-81	pyroxenite	adcumulate	49.61	1.04	6.87	6.51	0.14	13.27	20.27	1.26	0.23	99.19	1.83	0.03	0.30	0.06	0.14	0.00	0.73	0.80	0.09	0.01	4.00	2.13	0.17	0.13	0.30	46.2	42.0	11.8	100.00	0.784	0.02
TM 22 7-82	pyroxenite	adcumulate	49.67	1.08	7.08	6.24	0.22	13.45	20.27	1.39	0.30	99.70	1.82	0.03	0.31	0.08	0.12	0.01	0.74	0.80	0.10	0.01	4.00	2.13	0.18	0.13	0.31	46.0	42.5	11.5	100.00	0.793	0.03
TM 22 7-83	pyroxenite	adcumulate	48.98	1.14	7.68	6.70	0.09	12.68	20.28	1.25	0.35	99.16	1.82	0.03	0.34	0.05	0.16	0.00	0.70	0.81	0.09	0.01	4.00	2.15	0.18	0.15	0.34	46.9	40.8	12.3	100.00	0.771	0.03
TM 22 7-84	pyroxenite	adcumulate	48.95	1.35	7.75	6.33	0.20	13.13	20.31	1.31	0.29	99.62	1.80	0.04	0.34	0.07	0.12	0.01	0.72	0.80	0.09	0.01	4.00	2.14	0.20	0.14	0.34	46.5	41.8	11.7	100.00	0.787	0.02
TM 22 7-86	pyroxenite	adcumulate	49.39	1.17	7.34	6.52	0.16	13.05	20.33	1.33	0.33	99.61	1.82	0.03	0.32	0.06	0.14	0.00	0.72	0.80	0.09	0.01	4.00	2.14	0.18	0.14	0.32	46.5	41.5	11.9	100.00	0.781	0.03
TM 22 7-87	pyroxenite	adcumulate	49.09	1.28	7.49	6.80	0.21	12.81	19.56	1.40	0.26	98.92	1.82	0.04	0.33	0.05	0.16	0.01	0.71	0.78	0.10	0.01	4.00	2.15	0.18	0.15	0.33	45.6	41.6	12.8	100.00	0.771	0.02
TM 22 7-88	pyroxenite	adcumulate	49.62	1.01	7.18	6.87	0.14	13.59	20.08	1.36	0.17	100.02	1.82	0.03	0.31	0.09	0.12	0.00	0.74	0.79	0.10	0.01	4.00	2.13	0.18	0.13	0.31	45.2	42.5	12.3	100.00	0.779	0.02
